# Supplementary material for: Nanoporous semi-cycloaliphatic polyaminal networks for capture of SO2, NH3, and I2
Source: Royal Society of Chemistry journal article supplement (doi:10.1039/d2ta10031b), 2023-01-01
Supplement: d2ta10031b1.pdf [file d2ta10031b1.pdf]

## Electronic Supplementary Information (ESI)

# Nanoporous Semi-cycloaliphatic Polyaminal Networks for Capture of SO<sub>2</sub>, NH<sub>3</sub>, and I<sub>2</sub>

Jun Yan,<sup>\*ab</sup> Sihan Tong,<sup>ab</sup> Haiyu Sun,<sup>ab</sup> and Shengwei Guo.<sup>ab</sup>

*<sup>a</sup>Key Laboratory of Polymer Materials and Manufacturing Technology, School of Materials Science and Engineering, North Minzu University, Yinchuan 750021, China*

*<sup>b</sup>International Scientific and Technological Cooperation Base of Industrial Solid Waste Cyclic Utilization and Advanced Materials, Yinchuan 750021, China*

\*Email: [yanjun2018@nun.edu.cn](mailto:yanjun2018@nun.edu.cn)

## Experimental Section

### Materials

Piperazine, anhydrous dimethyl sulfoxide (DMSO 99.7%, Superdry), N, N-dimethylformamide (DMF, 99.8%, SuperDry), N, N-dimethylacetamide (DMAc), adamantane, tetraphenylmethane, and all other reagents were purchased from J&K Chemical Co., Ltd. THF was purified by refluxing over sodium with a benzophenone complex indicator. The two tetraaldehyde monomers 1,3,5,7-tetrakis(4'-aldehydephenyl)adamantane (TFPAd)<sup>1</sup> and tetrakis(4-aldehydephenyl)methane (TFPM)<sup>2</sup> were prepared using the same synthetic process described previously without modification.

### sPAN synthesis

The sPAN-1 was synthesized using the following procedure: In a Schlenk flask of 50 mL, TFPAd (0.5527 g, 0.1 mmol), piperazine (0.3446 g, 0.4 mmol), and DMSO (18.0 mL) were charged under argon. The mixture was heated to 180 °C and stirred for 48 h. The solid was isolated by filtration and subsequently washed with DMSO, DMF, and THF. As a final step, the isolated solid was extracted with THF in a Soxhlet apparatus for three days and dried at 120°C under vacuum to produce sPAN-1 (Yield: 97%).

The sPAN-2 was similarly prepared except that the tetraaldehyde monomer was TFPM instead of TFPAd.

### Material characterization

Field-emission scanning electron microscopy (FE-SEM), fourier transform infrared (FTIR) spectroscopy, solid-state <sup>13</sup>C cross-polarization (CP)/total suppression of spinning side bands (TOSS) NMR spectrometer, elemental analyses (EA), powder wide-angle X-ray diffraction

(WAXD), and thermogravimetric analysis (TGA) were performed involving similar methodology and device as in our prior works.<sup>3-6</sup> Raman spectra were collected on a HORIBA HR Evolution equipped with a 532 nm laser. Adsorption measurements for SO<sub>2</sub>, NH<sub>3</sub>, and CO<sub>2</sub> were conducted on a gas adsorption analyzer (BSD-PMC, BeiShiDe Instrument Co. Ltd., China). A Quantachrome Instruments Autosorb iQ gas sorption analyzer was used to analyze the N<sub>2</sub> sorption isotherms (77 K) of the as-synthesized polymers. Before all the testing, the polymers were degassed overnight at 120 °C under vacuum. In a sealed sPANs container, a sample of sPANs powder (40 mg) and an excess of crystalline iodine was heated at 348 K under ambient pressure. The container was swiftly cooled to room temperature after a set time, and the sPANs sample was weighed. The I<sub>2</sub> uptake of sPANs was obtained using weight gain:  $= (m_2 - m_1) / m_1$ , where the I<sub>2</sub> uptake and m<sub>1</sub> and m<sub>2</sub> are the masses of the sPANs sample before and after I<sub>2</sub> vapor exposure, respectively.

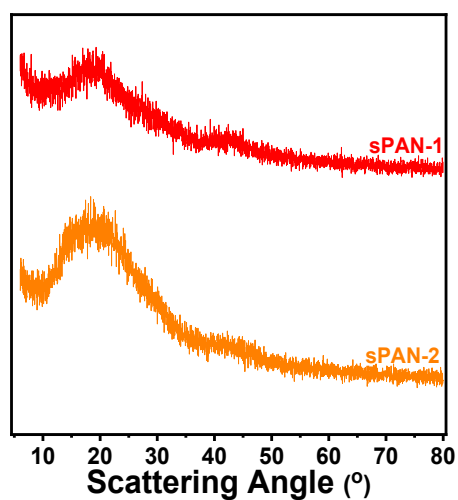

Fig. S1 X-ray diffractions of the two sPANs.

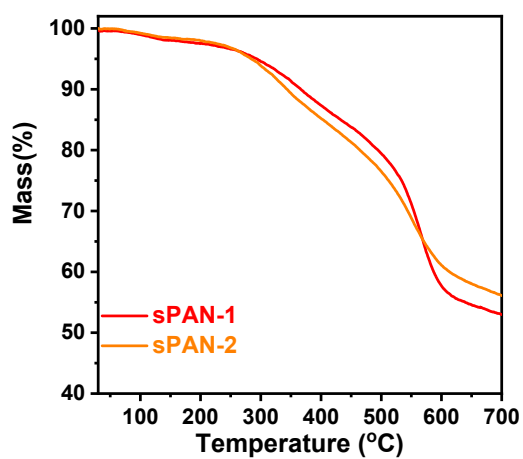

Fig. S2 TGA curves of sPANs.

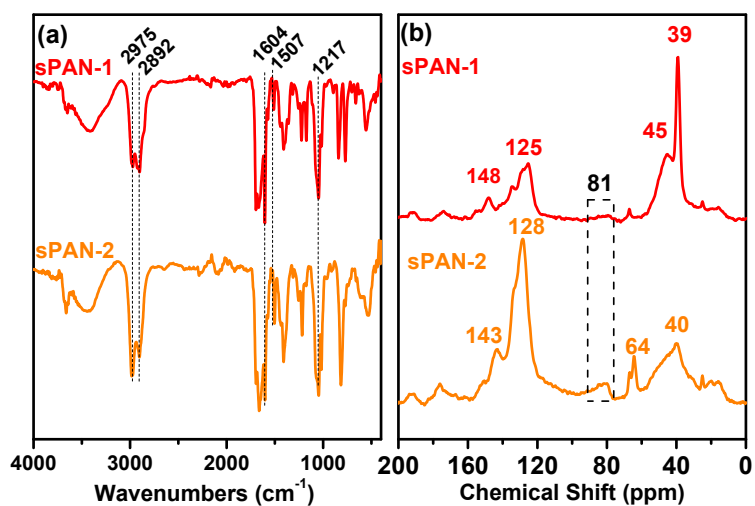

Fig. S3 FT-IR spectrum (a) and Solid-state  $^{13}\text{C}$  CP/TOSS NMR spectra (b) of sPAN-1 and sPAN-

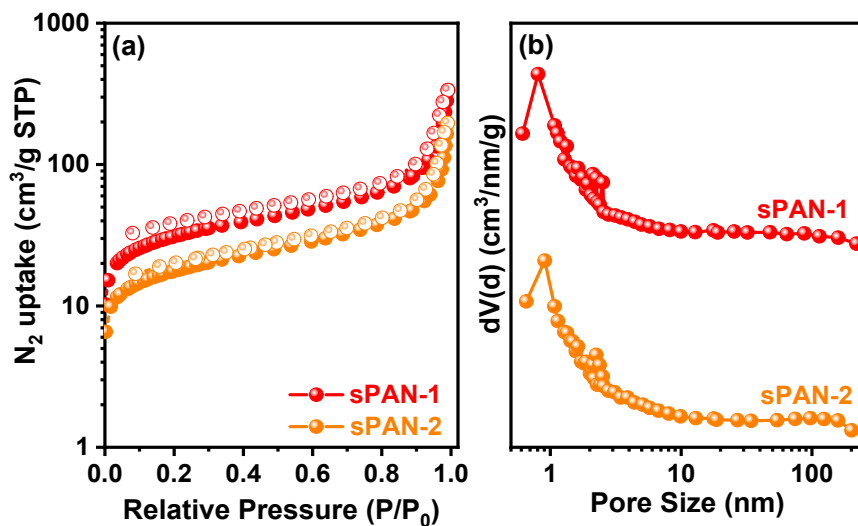

**Fig. S4** Specific surface area testing of the sPANs: (a) N<sub>2</sub> adsorption (filled symbol) and desorption (empty symbol) isotherms obtained at 77 K; (b) pore size distribution curves calculated based on NLDFT.

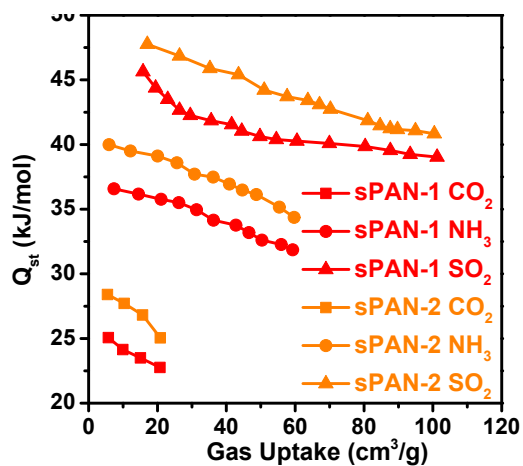

**Fig. S5** Variation of the adsorption enthalpies for SO<sub>2</sub>, NH<sub>3</sub>, and CO<sub>2</sub> with the adsorbed amount in the sPANs.

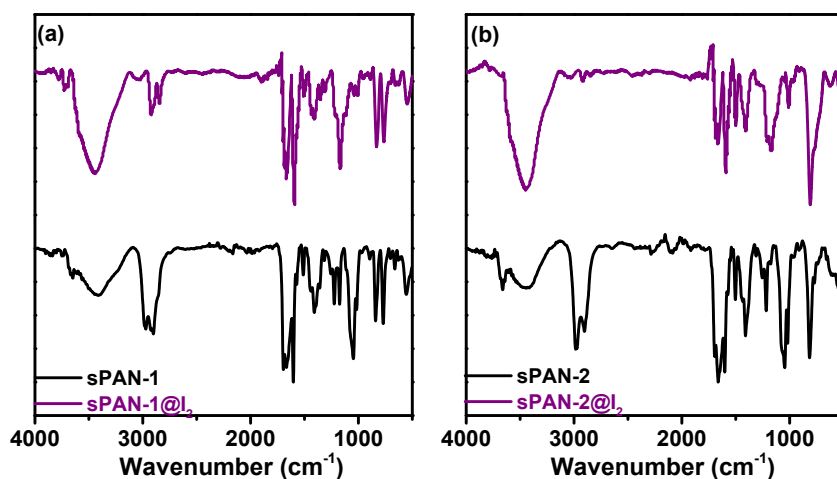

**Fig. S6** FT-IR spectra of sPAN-1 (a) and sPAN-2 (b) before (black line) and after (purple line) adsorption of iodine vapor.

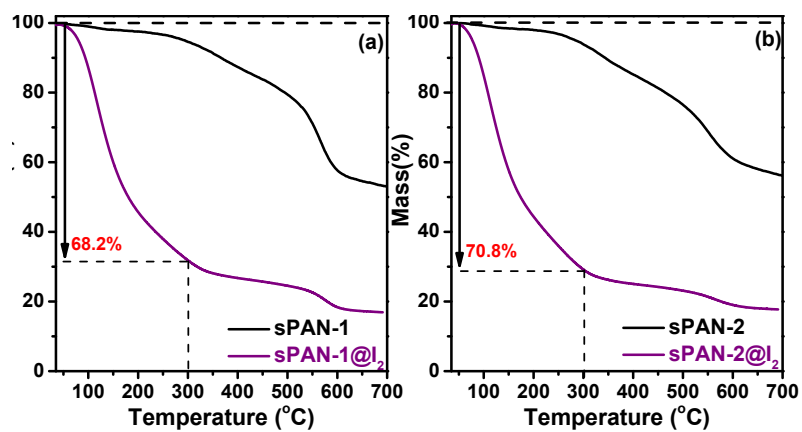

**Fig. S7** TGA curves of sPAN-1 (a) and sPAN-2 (b) before (black line) and after (purple line) adsorption of iodine vapor.

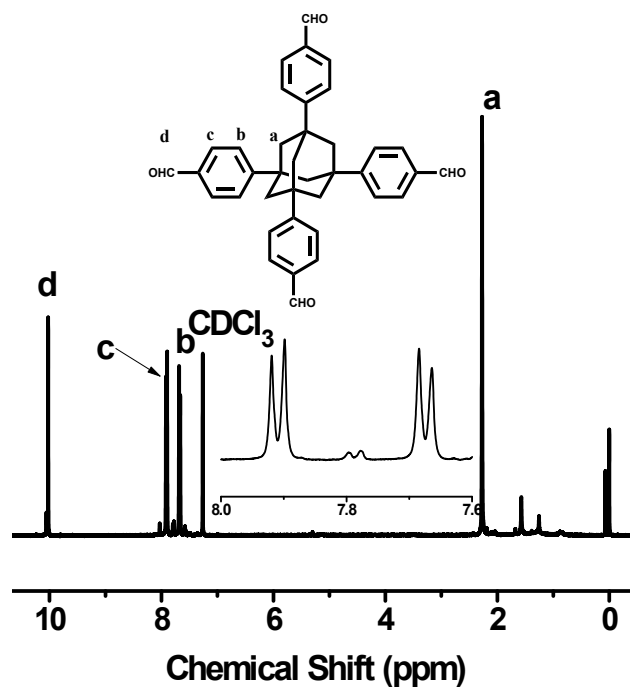

Fig. S8  $^1\text{H}$  NMR spectrum of 1,3,5,7-tetrakis(4'-aldehydephenyl)adamantane (TFPAd).

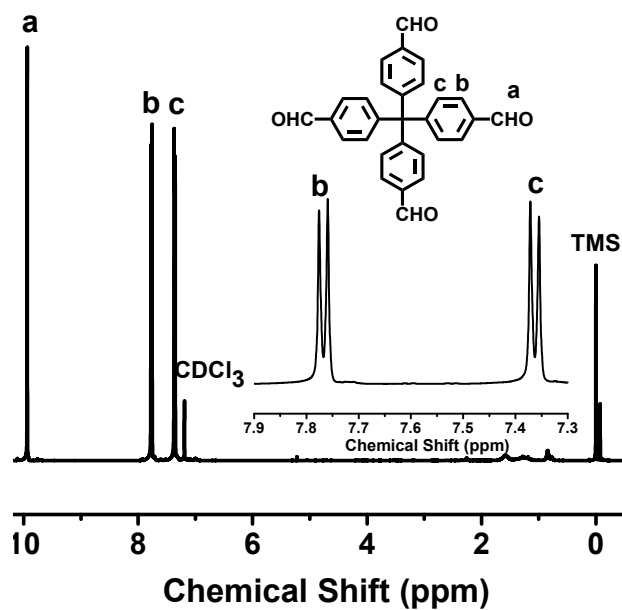

Fig. S9  $^1\text{H}$  NMR spectrum of tetrakis(4-aldehydephenyl)methane(TFPM).

**Table S1.** The chemical composition of sPANs

| <b>Samples</b> | <b>Measured value (wt%)</b> |          |          | <b>Theoretical value (wt%)</b> |          |          |
|----------------|-----------------------------|----------|----------|--------------------------------|----------|----------|
|                | <b>C</b>                    | <b>H</b> | <b>N</b> | <b>C</b>                       | <b>H</b> | <b>N</b> |
| <b>sPAN-1</b>  | 66.05                       | 5.180    | 6.65     | 78.60                          | 7.82     | 13.58    |
| <b>sPAN-2</b>  | 68.11                       | 5.603    | 8.43     | 76.67                          | 7.44     | 15.90    |



**Table S2.** SO<sub>2</sub>, NH<sub>3</sub>, and CO<sub>2</sub> uptakes in sPANs and some reported porous materials

| Samples                    | S <sub>BET</sub><br>m <sup>2</sup> /g | SO <sub>2</sub> (mmol/g) |       | NH <sub>3</sub><br>(mmol/g) |       | CO <sub>2</sub> (mmol/g) |              | Ref       |
|----------------------------|---------------------------------------|--------------------------|-------|-----------------------------|-------|--------------------------|--------------|-----------|
|                            |                                       | 273 K                    | 298 K | 273 K                       | 298 K | 273 K                    | 298 K        |           |
|                            |                                       |                          |       |                             |       |                          |              |           |
| sPAN-1                     | 113                                   | 8.45                     | 5.56  | 5.35                        | 3.55  | 1.55                     | 1.09         | This Work |
| sPAN-2                     | 65                                    | 9.36                     | 5.64  | 6.62                        | 3.60  | 1.35                     | 0.94         | This Work |
| IRA-900 (Cl)               | 16.9                                  | -                        | 3.69  | -                           | -     | -                        | 0.01         | 7         |
| SIFSIX-3-Zn                | -                                     | about<br>2.34            | 2.10  | -                           | -     | -                        | -            | 8         |
| SIFSIX-3-Ni                | 223                                   | about<br>3.00            | 2.74  | -                           | -     | -                        | 2.80         | 8         |
| ELM-12                     | 706                                   | 3.0                      | 2.73  | -                           | -     | 2.23                     | 1.30         | 9         |
| CC3                        | 402                                   | -                        | 2.78  | -                           | -     | -                        | -            | 10        |
| RCC3                       | -                                     | -                        | 12.34 | -                           | -     | -                        | -            | 10        |
| 6FT-RCC3                   | 396                                   | -                        | 13.78 | -                           | -     | -                        | -            | 10        |
| SU-101                     | 350                                   | -                        | 2.20  | -                           | -     | 2.50                     | -            | 11        |
| NOT-300                    | -                                     | 8.1                      | -     | -                           | -     | 7.0                      | -            | 12        |
| NPC-1                      | 3186.5                                | -                        | 2.45  | -                           | -     | -                        | -            | 13        |
| NPC-2                      | 2426.2                                | -                        | 1.76  | -                           | -     | -                        | -            | 13        |
| NPC-3                      | 2252.1                                | -                        | 2.44  | -                           | -     | -                        | -            | 13        |
| PIM-1                      | 800                                   | -                        | 5.53  | -                           | 3.92  | -                        | -            | 14        |
| PIM1-AX                    | 550                                   | -                        | 5.89  | -                           | 6.82  | -                        | -            | 14        |
| PIM-1-COOH                 | 500                                   | -                        | 7.32  | -                           | 12.2  | -                        | -            | 14        |
| POP-BPh                    | 965                                   | -                        | 6.5   | -                           | -     | 1.92                     | 1.07         | 15        |
| PDVB                       | 639                                   | -                        | 3.8   | -                           | -     | 0.7                      | 0.39         | 15        |
| PI-COF-m                   | 1003                                  | -                        | 6.5   | -                           | -     | -                        | -            | 16        |
| PI-COF-m10                 | 831                                   | -                        | 6.3   | -                           | -     | -                        | -            | 16        |
| PI-COF-m20                 | 548                                   | -                        | 5.6   | -                           | -     | -                        | -            | 16        |
| [HOOC] <sub>0</sub> -COF   | 713                                   | -                        | -     | -                           | -     | -                        | 7.00         | 17        |
| [HOOC] <sub>17</sub> -COF  | 652                                   | -                        | -     | -                           | -     | -                        | 9.34         | 17        |
| [HOOC] <sub>33</sub> -COF  | 458                                   | -                        | -     | -                           | -     | -                        | 8.21         | 17        |
| [HOOC] <sub>50</sub> -COF  | 279                                   | -                        | -     | -                           | -     | -                        | 6.67         | 17        |
| [HOOC] <sub>100</sub> -COF | 150                                   | -                        | -     | -                           | -     | -                        | 4.14         | 17        |
| PAF-1                      | 4240                                  | -                        | -     | -                           | -     | -                        | about<br>2.8 | 18        |
| 1T                         | 915                                   | -                        | -     | -                           | -     | -                        | 3.8          | 19        |
| 1TC                        | 552                                   | -                        | -     | -                           | -     | -                        | 6.41         | 19        |
| 1TCS                       | 72.5                                  | -                        | -     | -                           | -     | -                        | 8.52         | 19        |

|          |      |      |      |   |   |      |      |    |
|----------|------|------|------|---|---|------|------|----|
| HCP-PN-1 | 420  | -    | -    | - | - | 1.63 | 1.32 | 20 |
| HCP-PN-2 | 210  | -    | -    | - | - | 1.11 | 0.86 | 20 |
| MPI      | 1001 | -    | -    | - | - | 2.76 | 1.71 | 21 |
| MPI-S    | 448  | -    | -    | - | - | 1.58 | 1.07 | 21 |
| MPI-Ag   | 103  | -    | -    | - | - | 1.46 | 0.97 | 21 |
| PAN-5F   | 502  | -    | -    | - | - | 1.14 | 0.88 | 22 |
| 3AM2CL   | 196  | -    | -    | - | - | 1.21 | 0.60 | 23 |
| 2AM3CL   | 105  | -    | -    | - | - | 1.10 | 0.56 | 23 |
| 2AM2CL   | 47   | -    | -    | - | - | 0.99 | 0.52 | 23 |
| TAM-POF  | 974  | 13.0 | 9.45 | - | - | 3.0  | 1.40 | 24 |
| PCN-H    | 2000 | -    | -    | - | - | -    | 2.28 | 25 |
| ANOP-1   | 149  | -    | -    | - | - | 1.45 | 0.95 | 26 |
| ANOP-2   | 638  | -    | -    | - | - | 2.31 | 1.38 | 26 |

---

**Table S3.** Single-site Langmuir–Freundlich simulated parameters for the two polymers.

| <b>Samples</b> | <b>Gas</b>      | <b>T (K)</b> | <b><math>a</math> (<math>\times 10^2</math> mmol/g)</b> | <b><math>b</math> (<math>\times 10^{-4}</math> kPa<sup>-1</sup>)</b> | <b><math>c</math></b> | <b><math>R^2</math></b> |
|----------------|-----------------|--------------|---------------------------------------------------------|----------------------------------------------------------------------|-----------------------|-------------------------|
|                | SO <sub>2</sub> | 298          | 6.9667                                                  | 9.3843                                                               | 0.4524                | 0.9953                  |
| <b>sPAN-1</b>  | NH <sub>3</sub> | 298          | 3.8517                                                  | 8.3475                                                               | 0.5197                | 0.9991                  |
|                | CO <sub>2</sub> | 298          | 1.2736                                                  | 1.2862                                                               | 0.8996                | 0.9912                  |
|                | SO <sub>2</sub> | 298          | 6.6838                                                  | 9.7857                                                               | 0.4604                | 0.9958                  |
| <b>sPAN-2</b>  | NH <sub>3</sub> | 298          | 4.2162                                                  | 8.8968                                                               | 0.4895                | 0.9996                  |
|                | CO <sub>2</sub> | 298          | 1.1304                                                  | 0.9517                                                               | 0.9348                | 0.9722                  |

**Table S4.** SO<sub>2</sub>/CO<sub>2</sub> selectivity of sPANs and some reported porous materials at 298 K and 100 kPa

| Samples         | V(SO <sub>2</sub> )/V(CO <sub>2</sub> ) | SO <sub>2</sub> /CO <sub>2</sub> selectivity | Ref       |
|-----------------|-----------------------------------------|----------------------------------------------|-----------|
| sPAN-1          | 10:90                                   | 37.6                                         | This Work |
| sPAN-2          | 10:90                                   | 50.3                                         | This Work |
| ELM-12          | 10:90                                   | 30                                           | 9         |
| MFM-170         | 10:90                                   | 30                                           | 27        |
| MFM-601         | 10:90                                   | 32                                           | 28        |
| POP-Py          | 10:90                                   | 31                                           | 15        |
| POP-BPy         | 10:90                                   | 29.8                                         | 15        |
| POP-PyI         | 10:90                                   | 19.5                                         | 15        |
| POP-PyA         | 10:90                                   | 25.0                                         | 15        |
| POP-BPh         | 10:90                                   | 17.8                                         | 15        |
| PDVB            | 10:90                                   | 19.5                                         | 15        |
| AC from Petcoke | 10:90                                   | 30                                           | 29        |
| HNIP-TBMB-1     | 10:90                                   | 91                                           | 30        |
| HNIP-TBMB-2     | 10:90                                   | 50                                           | 30        |
| HNIP-DCX-1      | 10:90                                   | 23                                           | 30        |
| GU-0.2          | 10:90                                   | 13.5 <sup>a</sup>                            | 31        |
| GU-0.5          | 10:90                                   | 15.8 <sup>a</sup>                            | 31        |
| GU-1            | 10:90                                   | 16 <sup>a</sup>                              | 31        |
| Gu-2            | 10:90                                   | 13.3 <sup>a</sup>                            | 31        |
| ECUT-100        | 1:99                                    | 26.9-27.5                                    | 32        |

<sup>a</sup>296.2 K and 100 kPa.

**Table S5.** I<sub>2</sub> uptakes in sPANs and some reported porous materials

| <b>Samples</b> | <b>S<sub>BET</sub> (m<sup>2</sup>/g)</b> | <b>T(K)</b> | <b>I<sub>2</sub> (mg/g)</b> | <b>Ref</b> |
|----------------|------------------------------------------|-------------|-----------------------------|------------|
| sPAN-1         | 113                                      | 348         | 2505                        | This Work  |
| sPAN-2         | 65                                       | 348         | 2656                        | This Work  |
| NRPP-1         | 1579                                     | 353         | 1920                        | 33         |
| NRPP-2         | 1028                                     | 353         | 2220                        | 33         |
| MALP-1         | 1179                                     | 350         | 2086                        | 34         |
| MALP-2         | 1126                                     | 350         | 2185                        | 34         |
| MALP-3         | 1141                                     | 350         | 1867                        | 34         |
| MALP-4         | 1093                                     | 350         | 2038                        | 34         |
| PAN-FPP5       | 788.0                                    | 345         | 2225                        | 35         |
| PAN-TPDA       | 752.0                                    | 345         | 1453                        | 35         |
| HCP-PN-1       | 420                                      | 353         | 1560                        | 20         |
| HCP-PN-2       | 210                                      | 353         | 1900                        | 20         |
| CSU-CPOPs-1    | 1032.4                                   | 353         | 4940                        | 36         |
| CSU-CPOPs-2    | 554.8                                    | 353         | 4240                        | 36         |
| CSU-CPOPs-3    | 268.8                                    | 353         | 3470                        | 36         |
| NOP-53         | 744                                      | 348         | 1770                        | 37         |
| NOP-54         | 1178                                     | 348         | 2020                        | 37         |
| NOP-55         | 526                                      | 348         | 1390                        | 37         |
| OM-COF-300     | 1410                                     | 348         | 3150                        | 38         |
| NM-COF-300     | 1374                                     | 348         | 1480                        | 38         |
| FcTz-POP       | 410                                      | 348         | 3960                        | 39         |
| BpTz-POP       | 414                                      | 348         | 2160                        | 39         |
| HCPs-B         | 717                                      | 348         | 1070                        | 40         |
| HCPs-N         | 579                                      | 348         | 2100                        | 40         |
| HCPs-S         | 167                                      | 348         | 1790                        | 40         |
| CMP-LS4        | 462                                      | 353         | 3320                        | 41         |
| CMP-LS5        | 1185                                     | 353         | 4400                        | 41         |
| CMP-LS6        | 679                                      | 353         | 2440                        | 41         |
| TTPT           | 315.5                                    | 350         | 1770                        | 42         |
| BDP-CPP-1      | 635                                      | 348         | 2830                        | 43         |
| BDP-CPP-2      | 235                                      | 348         | 2230                        | 43         |
| NBDP-CPP       | 658                                      | 348         | 1500                        | 43         |
| Azo-Trip       | 510.4                                    | 350         | 2380                        | 44         |
| ANOP-1         | 149                                      | 348         | 3111                        | 26         |
| ANOP-2         | 638                                      | 348         | 3209                        | 26         |

**Table S6.** Results from Linear Regression of Adsorption Rate Experiments of sPAN-1 and sPAN-2

| Samples | Pseudo-first order kinetics (PFO) |                                      |                | Pseudo-second order kinetics (PSO) |                                                |                |
|---------|-----------------------------------|--------------------------------------|----------------|------------------------------------|------------------------------------------------|----------------|
|         | a<br>(mg/g)                       | K <sub>1</sub><br>(h <sup>-1</sup> ) | R <sup>2</sup> | a (mg/g)                           | K <sub>2</sub><br>(×10 <sup>-5</sup> g/(mg×h)) | R <sup>2</sup> |
| sPAN-1  | 2516                              | 0.2012                               | 0.9992         | 2897                               | 8.509                                          | 0.9867         |
| sPAN-2  | 2723                              | 0.1386                               | 0.9969         | 3298                               | 4.497                                          | 0.9851         |

## Reference

1. G. Li, B. Zhang, J. Yan and Z. Wang, *Chem. Commun.*, 2014, **50**, 1897-1899.
2. L. Zeng, P. Liao, H. Liu, L. Liu, Z. Liang, J. Zhang, L. Chen and C.-Y. Su, *J. Mater. Chem. A*, 2016, **4**, 8328-8336.
3. J. Yan, S. Tong, H. Sun and S. Guo, *Sep. Purif. Technol.*, 2023, **311**, 123205.
4. J. Yan, Y. Tan, L. Wei, Z. Liu, Q. Wang, H. Sun, Z. Wang, D. Li, Y. Qian and S. Guo, *Ind. Eng. Chem. Res.*, 2022, **61**, 13453-13460.
5. J. Yan, H. Sun, Q. Wang, L. Lu, B. Zhang, Z. Wang, S. Guo and F. Han, *New J. Chem.*, 2022, **46**, 7580-7587.
6. J. Yan, Z. Liu, H. Sun, S. Tong and S. Guo, *New J. Chem.*, 2022, **46**, 19401-19406.
7. X. Wu, H.-C. Lan, N.-N. Cheng, T. Guo, W.-T. Zheng, Y. Chen and K. Huang, *Fuel*, 2022, **310**, 122468.
8. X. Cui, Q. Yang, L. Yang, R. Krishna, Z. Zhang, Z. Bao, H. Wu, Q. Ren, W. Zhou, B. Chen and H. Xing, *Adv. Mater.*, 2017, **29**, 1606929.
9. Y. Zhang, P. Zhang, W. Yu, J. Zhang, J. Huang, J. Wang, M. Xu, Q. Deng, Z. Zeng and S. Deng, *ACS Appl. Mater. Interfaces*, 2019, **11**, 10680-10688.
10. E. Martínez-Ahumada, D. He, V. Berryman, A. Lopez-Olvera, M. Hernandez, V. Jancik, V. Martis, M. A. Vera, E. Lima, D. J. Parker, A. I. Cooper, I. A. Ibarra and M. Liu, *Angew. Chem. Int. Ed.*, 2021, **60**, 17556-17563.
11. E. S. Grape, J. G. Flores, T. Hidalgo, E. Martínez-Ahumada, A. Gutiérrez-Alejandre, A. Hautier, D. R. Williams, M. O'Keeffe, L. O. hrström, T. Willhammar, P. Horcajada, I. A. Ibarra and A. K. Inge, *J. Am. Chem. Soc.*, 2020, **142**, 16795-16804.
12. S. Yang, J. Sun, D. Anderson, A. J. Ramirez-Cuesta, R. N. Ruth Newby, A. J. Blake, S. K. Callear, J. E. Parker, W. I. F. David, C. C. Tang and M. Schröder, *Nat. Chem.*, 2012, **4**, 887-894.
13. A. Wang, R. Fan, X. Pi, S. Hao, X. Zheng and Y. Yang, *Cryst. Growth Des.*, 2019, **19**, 1973-1984.
14. D. Jung, Z. Chen, S. Alayoglu, M. R. Mian, T. A. Goetjen, K. B. Idrees, K. O. Kirlikovali, T. Islamoglu and O. K. Farha, *ACS Appl. Mater. Interfaces*, 2021, **13**, 10409-10415.
15. Z. Dai, W. Chen, X. Kan, F. Li, Y. Bao, F. Zhang, Y. Xiong, X. Meng, A. Zheng, F. S. Xiao and F. Liu, *ACS Macro Lett*, 2022, **11**, 999-1007.
16. G. Y. Lee, J. Lee, H. T. Vo, S. Kim, H. Lee and T. Park, *Sci. Rep.*, 2017, **7**, 557.
17. Y. Yang, M. Faheem, L. Wang, Q. Meng, H. Sha, N. Yang, Y. Yuan and G. Zhu, *ACS Cent. Sci.*, 2018, **4**, 748-754.
18. J. F. Van Humbeck, T. M. McDonald, X. Jing, B. M. Wiers, G. Zhu and J. R. Long, *J. Am. Chem. Soc.*, 2014, **136**, 2432-2440.
19. D. W. Kang, M. Kang, M. Moon, H. Kim, S. Eom, J. H. Choe, W. R. Lee and C. S. Hong, *Chem. Sci.*, 2018, **9**, 6871-6877.
20. A. Abid, S. Razzaque, I. Hussain and B. Tan, *Macromolecules*, 2021, **54**, 5848-5855.
21. J. Yan, B. Zhang, L. Guo and Z. Wang, *J. Phys. Chem. C*, 2018, **123**, 575-583.
22. C. Wang, J. Zhang and Z. Wang, *ACS Appl. Nano Mater.*, 2021, **4**, 14060-14068.
23. S.-C. Qi, J.-K. Wu, J. Lu, G.-X. Yu, R.-R. Zhu, Y. Liu, X.-Q. Liu and L.-B. Sun, *J. Mater. Chem. A*, 2019, **7**, 17842-17853.
24. S. Chen, Y. Wu, W. Zhang, S. Wang, T. Yan, S. He, B. Yang and H. Ma, *Chem. Eng. J.*,

- 2022, **429**, 132480.
25. S.-C. Qi, Y.-F. Yu, Z.-H. Yang, X.-Y. Liu, X.-J. Lu, X.-Q. Liu and L.-B. Sun, *AIChE J.*, 2022, e17994, DOI: 10.1002/aic.17994.
  26. J. Yan, Y. Guo, S. Xie, Q. Wang, Z. Leng, D. Li, K. Qi and H. Sun, *Macromol. Chem. Phys.*, 2022, **223**, 2200034.
  27. G. L. Smith, J. E. Eyley, X. Han, X. Zhang, J. Li, N. M. Jacques, H. G. W. Godfrey, S. P. Argent, L. J. McCormick McPherson, S. J. Teat, Y. Cheng, M. D. Frogley, G. Cinque, S. J. Day, C. C. Tang, T. L. Easun, S. Rudic, A. J. Ramirez-Cuesta, S. Yang and M. Schroder, *Nat. Mater.*, 2019, **18**, 1358-1365.
  28. J. H. Carter, X. Han, F. Y. Moreau, I. da Silva, A. Nevin, H. G. W. Godfrey, C. C. Tang, S. Yang and M. Schroder, *J. Am. Chem. Soc.*, 2018, **140**, 15564-15567.
  29. J. H. Jacobs, K. G. Wynnyk, R. Lalani, R. Sui, J. Wu, V. Montes, J. M. Hill and R. A. Marriott, *Ind. Eng. Chem. Res.*, 2019, **58**, 18896-18900.
  30. X.-C. An, Z.-M. Li, Y. Zhou, W. Zhu and D.-J. Tao, *Chem. Eng. J.*, 2020, **394**, 124859.
  31. J.-Y. Zhang, J.-B. Zhang, M. Li, Z. Wu, S. Dai and K. Huang, *Chem. Eng. J.*, 2020, **391**, 123579.
  32. L. J. Guo, X. F. Feng, Z. Gao, R. Krishna and F. Luo, *Inorg. Chem.*, 2021, **60**, 1310-1314.
  33. Y. H. Abdelmoaty, T. D. Tessema, F. A. Choudhury, O. M. El-Kadri and H. M. El-Kaderi, *ACS Appl. Mater. Interfaces* 2018, **10**, 16049-16058.
  34. M. Rong, L. Yang, L. Wang, H. Xing, J. Yu, H. Qu and H. Liu, *Ind. Eng. Chem. Res.*, 2019, **58**, 17369-17379.
  35. S. Zhang, X. Li, W. Gong, T. Sun, Z. Wang and G. Ning, *Ind. Eng. Chem. Res.*, 2020, **59**, 3269-3278.
  36. S. Xiong, X. Tang, C. Pan, L. Li, J. Tang and G. Yu, *ACS Appl. Mater. Interfaces*, 2019, **11**, 27335-27342.
  37. D. Chen, Y. Fu, W. Yu, G. Yu and C. Pan, *Chem. Eng. J.*, 2018, **334**, 900-906.
  38. T. Liu, Y. Zhao, M. Song, X. Pang, X. Shi, J. Jia, L. Chi and G. Lu, *J. Am. Chem. Soc.*, 2023, **145**, 2544-2552.
  39. Y. Wang, J. Tao, S. Xiong, P. Lu, J. Tang, J. He, M. U. Javaid, C. Pan and G. Yu, *Chem. Eng. J.*, 2020, **380**, 122420.
  40. H. Ma, Q.-M. Zhang, G. Cheng, Z. Wang, Q.-S. Zong, B. Tan and C. Zhang, *ACS Appl. Polym. Mater.*, 2020, **3**, 209-215.
  41. S. Wang, Y. Liu, Y. Ye, X. Meng, J. Du, X. Song and Z. Liang, *Polym. Chem.*, 2019, **10**, 2608-2615.
  42. T. Geng, W. Zhang, Z. Zhu, G. Chen, L. Ma, S. Ye and Q. Niu, *Polym. Chem.*, 2018, **9**, 777-784.
  43. Y. Zhu, Y.-J. Ji, D.-G. Wang, Y. Zhang, H. Tang, X.-R. Jia, M. Song, G. Yu and G.-C. Kuang, *J. Mater. Chem. A*, 2017, **5**, 6622-6629.
  44. Q.-Q. Dang, X.-M. Wang, Y.-F. Zhan and X.-M. Zhang, *Polym. Chem.*, 2016, **7**, 643-647
